# Supplementary material
Source: Springer Nature journal article supplement (https://www.springermedizin.de/resource/supplementary/12875_2013_959_MOESM4_ESM.pdf/9435504)
Supplement: MOESM4 [file 9435504]

Patients with gout  
n = 305

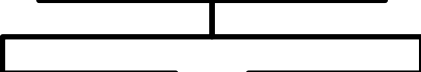

CVD score not recorded  
n = 200

CVD score recorded  
n = 105  
Methods used:  
Framingham n = 102  
QRISK 2 or QRISK = 3

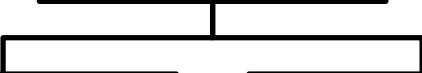

CVD score <20%  
n = 49

CVD score ≥20%  
n = 56

Lipid lowering therapy prescribed  
n = 30

Lipid lowering therapy not prescribed  
n = 26
